# Supplementary material for: EP4 as a Negative Prognostic Factor in Patients with Vulvar Cancer
Source: PubMed Central journal article supplement (PMC8003514; doi:10.3390/cancers13061410), 2021-03-19
Supplement: cancers-13-01410-s001.pdf [file cancers-13-01410-s001.pdf]

## Article

# EP4 as a Negative Prognostic Factor in Patients with Vulvar Cancer

Anna Buchholz<sup>1</sup>, Aurelia Vattai<sup>1</sup>, Sophie Fürst<sup>1</sup>, Theresa Viltsmaier<sup>1</sup>, Christina Kuhn<sup>1,2</sup>, Elisa Schmoeckel<sup>3</sup>, Doris Mayr<sup>3</sup>, Christian Dannecker<sup>1,2</sup>, Sven Mahner<sup>1</sup>, Udo Jeschke<sup>1,2,\*</sup> and Helene H. Heidegger<sup>1</sup>

- <sup>1</sup> Department of Obstetrics and Gynecology, University Hospital, LMU Munich, Marchioninistraße 15, 81377 Munich, Germany; buchholz.anna@web.de (A.B.); aurelia.vattai@med.uni-muenchen.de (A.V.); sophie.fuerst@med.uni-muenchen.de (S.F.); Theresa.Viltsmaier@med.uni-muenchen.de (T.V.); christina.kuhn@uk-augsburg.de (C.K.); christian.dannecker@med.uni-augsburg.de (C.D.); Sven.Mahner@med.uni-muenchen.de (S.M.); Helene.Heidegger@med.uni-muenchen.de (H.H.H.)
- <sup>2</sup> Department of Obstetrics and Gynecology, University Hospital Augsburg, Stenglinstrasse 2, 86156 Augsburg, Germany
- <sup>3</sup> Department of Pathology, LMU Munich, Thalkirchner Str. 142, 80337 Munich, Germany; elisa.schmoeckel@med.uni-muenchen.de (E.S.); doris.mayr@med.uni-muenchen.de (D.M.)
- \* Correspondence: udo.jeschke@med.uni-muenchen.de; Tel.: +49-89-4400-54240

**Citation:** Buchholz, A.; Vattai, A.; Fürst, S.; Viltsmaier, T.; Kuhn, C.; Schmoeckel, E.; Mayr, D.; Dannecker, C.; Mahner, S.; Jeschke, U.; et al. EP4 as a Negative Prognostic Factor in Patients with Vulvar Cancer. *Cancers* **2021**, *13*, 1410. <https://doi.org/10.3390/cancers13061410>

Academic Editor: David Wong

Received: 7 January 2021

Accepted: 17 March 2021

Published: 19 March 2021

**Publisher's Note:** MDPI stays neutral with regard to jurisdictional claims in published maps and institutional affiliations.

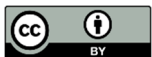

**Copyright:** © 2021 by the authors. Licensee MDPI, Basel, Switzerland. This article is an open access article distributed under the terms and conditions of the Creative Commons Attribution (CC BY) license (<http://creativecommons.org/licenses/by/4.0/>).

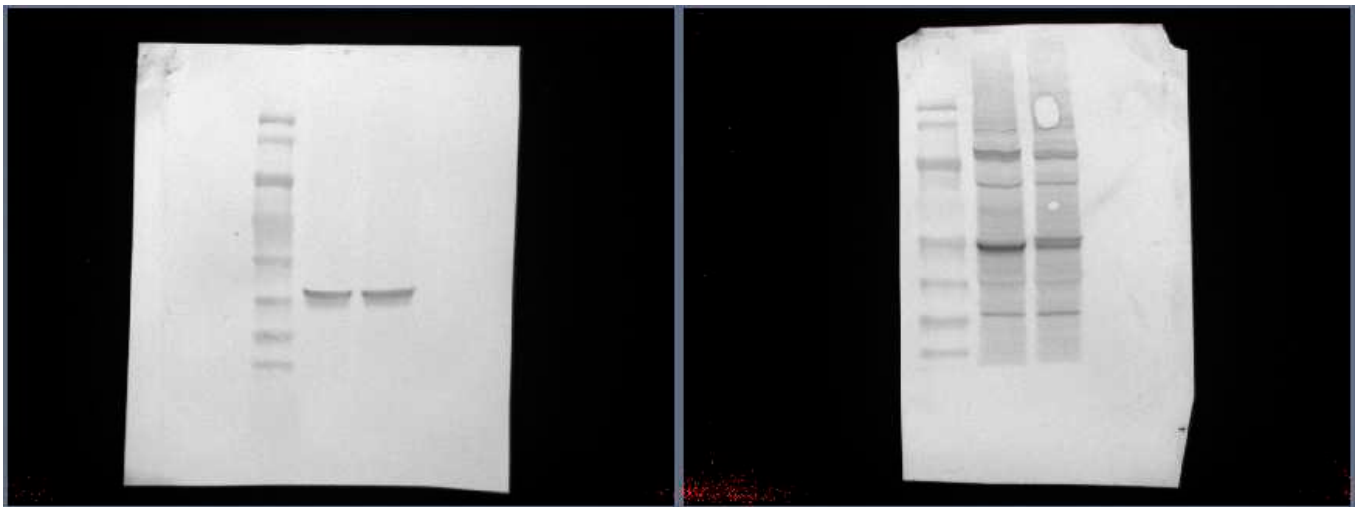

a. Western blot of beta aktin

b. Western blot of EP4

**Figure S1.** uncropped western blots with molecular weight markers.
